# Supplementary material for: Gold nanoparticles are suitable cores for building tunable iminosugar multivalency
Source: Royal Society of Chemistry journal article supplement (doi:10.1039/c5ra22152h), 2015-01-01

## SUPPORTING INFORMATION FOR

# Gold nanoparticles are suitable cores for building tunable iminosugar multivalency

C. Matassini,<sup>a,b</sup> M. Marradi,<sup>b,c,†\*</sup> F. Cardona,<sup>a</sup> C. Parmeggiani,<sup>a,d</sup> I. Robina,<sup>e</sup> A. J. Moreno-Vargas,<sup>e</sup> S. Penadés,<sup>b,c</sup> A. Goti<sup>a\*</sup>

[a] Dr. C. Matassini, Dr. C. Parmeggiani, Dr. F. Cardona, Prof. A. Goti, Department of Chemistry “Ugo Schiff” University of Florence Via della Lastruccia 3-13, 50019 Sesto Fiorentino (FI), Italy; [b] Dr. C. Matassini, Dr. M. Marradi, Prof. S. Penadés CIC biomaGUNE, Biofunctional Nanomaterials Unit, Lab. GlycoNanoTechnology, P. Miramón 186, San Sebastián, Spain; [c] Dr. M. Marradi, Prof. S. Penadés, CIBER-BBN, P. Miramón 186, 20009 San Sebastián, Spain; [d] Dr. C. Parmeggiani, CNR-INO, U.O.S. Sesto Fiorentino and LENS, via Nello Carrara 1, 50019 Sesto Fiorentino (FI), Italy; [e] Prof. I. Robina, Dr. A. J. Moreno-Vargas, Departamento de Química Orgánica, Facultad de Química, Universidad de Sevilla, Prof. García González 1, E-41012, Sevilla, Spain; †Dr. M. Marradi present address: IK4-CIDETEC, Biomaterials Unit, P. Miramón 196, San Sebastián, Spain.

## Table of contents

|                                                                                                                             |     |
|-----------------------------------------------------------------------------------------------------------------------------|-----|
| General methods                                                                                                             | S3  |
| Synthesis and characterization of pyrrolizidine alkaloid (PA) derivative <b>8</b>                                           | S4  |
| Synthesis and characterization of piperidine alkaloid (PIPA) derivative <b>9</b>                                            | S6  |
| General Procedure for the “in situ” deprotection of S-acetyl conjugates <b>8a</b> and <b>9a</b>                             | S8  |
| Preparation and characterization of Au-GNPs                                                                                 | S8  |
| General Procedure for the preparation of Au-GNPs coated with iminosugars                                                    | S8  |
| Preparation and characterization of 20% PA-βGlc NPs <b>12</b>                                                               | S9  |
| Preparation and characterization of 40% PA-βGlc NPs <b>13</b>                                                               | S11 |
| Preparation and characterization of 20% PA-αMan NPs <b>14</b>                                                               | S13 |
| Preparation and characterization of 40% PA-αMan NPs <b>15</b>                                                               | S15 |
| Preparation and characterization of 20% PIPA-βGlc NPs <b>16</b>                                                             | S17 |
| Preparation and characterization of 40% PIPA-βGlc NPs <b>17</b>                                                             | S19 |
| Inhibition of <b>N-acetyl 1</b> , Au-GNPs <b>12-15</b> , <b>18</b> and <b>19</b> towards a panel of commercial glycosidases | S21 |
| IC <sub>50</sub> of Au-GNPs <b>N-acetyl 1</b> towards Amyloglucosidase from <i>Aspergillus niger</i>                        | S23 |
| IC <sub>50</sub> of Au-GNPs <b>12</b> towards Amyloglucosidase from <i>Aspergillus niger</i>                                | S23 |
| IC <sub>50</sub> of Au-GNPs <b>13</b> towards Amyloglucosidase from <i>Aspergillus niger</i>                                | S24 |
| IC <sub>50</sub> of Au-GNPs <b>14</b> towards Amyloglucosidase from <i>Aspergillus niger</i>                                | S24 |
| IC <sub>50</sub> of Au-GNPs <b>15</b> towards Amyloglucosidase from <i>Aspergillus niger</i>                                | S25 |

## General methods

All chemicals were purchased as reagent grade from Sigma–Aldrich, except chloroauric acid (Strem Chemicals), and were used without further purification. Reactions were monitored by thin-layer chromatography (TLC) on silica gel 60 F254 aluminium-backed sheets (Merck) with visualization under UV (254 nm) and/or by staining with *p*-anisaldehyde solution [anisaldehyde (25 mL), H<sub>2</sub>SO<sub>4</sub>(25 mL), EtOH (450 mL), and CH<sub>3</sub>COOH (1 mL)], 10% H<sub>2</sub>SO<sub>4</sub> solution in EtOH, ninhydrin solution [ninhydrin (0.25 mL), EtOH (100 mL)] followed by heating at over 200 °C. Size-exclusion column chromatography was performed on Sephadex LH-20 (GE Healthcare). Flash column chromatography (FCC) was performed on silica gel 60 (0.063–0.200 mm; Merck). UV/Vis spectra were measured with Beckman Coulter DU 800 UV/Vis spectrophotometer. Infrared (IR) spectra were recorded from 4000 to 750 cm<sup>-1</sup> with a Thermo Nicolet 6700 FT-IR model spectrometer; solids were pressed into KBr pellets and oils were subjected to attenuated total reflection (ATR). <sup>1</sup>H and <sup>13</sup>C NMR spectra were recorded on Bruker 500 MHz (high resolution) spectrometer. Chemical shifts ( $\delta$ ) are given in ppm relative to the residual signal of the solvent used. Coupling constants (*J*) are reported in Hz. Splitting patterns are described by using the following abbreviations: *br*, broad; *s*, singlet; *d*, doublet; *t*, triplet; *q*, quartet; *quin*, quintet; *m*, multiplet. Mass spectra were measured with an Esquire 6000 ESI-Ion Trap spectrometer from Bruker Daltonics. High-resolution mass spectra (HRMS) were obtained using the MALDI technique with a 4700 Proteomics Analyzer (Applied Biosystems) operated in MALDI-TOF-TOF configuration. Optical rotations were determined with a Perkin–Elmer 341 polarimeter. For transmission electron microscopy (TEM) examinations, a single drop (2  $\mu$ L) of an aqueous solution (ca. 0.05 mgmL<sup>-1</sup> in Milli-Qwater) of the gold glyconanoparticles (GNPs) was placed on a copper grid coated with a carbon film (Electron Microscopy Sciences). The grid was left to dry in air for several hours at room temperature. TEM analysis was performed with a JEOL JEM-2100F microscope, both operating at 200 kV. The average diameters and numbers of gold atoms of the GNPs were deduced as described in a previous study.<sup>1</sup> Laboratory distilled water was further purified using a Milli-Qreagent grade water system (Millipore).

---

<sup>1</sup> O. Martínez-Ávila, K. Hijazi, M. Marradi, C. Clevel, C. Campion, C. Kelly, S. Penadés, *Chem. Eur. J.* **2009**, *15*, 9874–9888.

**Synthesis of pyrrolizidine alkaloid (PA) derivative 8:** A solution of compound **7** (74.5 mg, 171  $\mu\text{mol}$ ), 1-hydroxybenzotriazole (HOBt, 34.7 mg, 257  $\mu\text{mol}$ ) and *O*-(Benzotriazol-1-yl)-*N,N,N',N'*-tetramethyluronium hexafluorophosphate (HBTU, 97.5 mg, 257  $\mu\text{mol}$ ) in DMF (2 mL) was left stirring for 30 min and then added to a solution of pyrrolizidine derivative **1** (33.5 mg, 178  $\mu\text{mol}$ ) and *N,N*-diisopropylethylamine (47  $\mu\text{L}$ , 267  $\mu\text{mol}$ ) in DMF (1.8 mL). The reaction mixture was left stirring at room temperature for 15 hours, then diluted with AcOEt (10 mL) and washed with H<sub>2</sub>O (5 x 4 mL). The organic layer was then washed with a saturated solution of NaHCO<sub>3</sub> (3 x 10mL), water (2 x 10 mL) and brine (1 x 8 mL), dried over anhydrous Na<sub>2</sub>SO<sub>4</sub> and concentrated under vacuum. Purification through gradient column chromatography (DCM/MeOH from 10:1 to 5 : 1) afforded **8** (53 mg, 87  $\mu\text{mol}$ ) in a 51% yield.  $R_f = 0.30$  (DCM/MeOH 7 : 1).  $[\alpha]_D^{29} = +9.6$  (c = 0.78, MeOH). <sup>1</sup>H NMR (500 MHz, CD<sub>3</sub>OD)  $\delta = 4.54$  (quin,  $J = 6.4$  Hz, 1H, 6-H), 4.02 (s, 2H, HNC(O)CH<sub>2</sub>-), 3.84-3.77 (m, 3H, 1-H, 2-H, 8-Ha), 3.72-3.59 (m, 13H, OCH<sub>2</sub>, 8-Hb), 3.53 (q,  $J = 6.5$  Hz, 1H, 7a-H), 3.49 (t,  $J = 6.7$  Hz, 2H, OCH<sub>2</sub>(CH<sub>2</sub>)<sub>11</sub>SAc), 3.22 (dd,  $J = 11.6, 5.9$  Hz, 1H, 5-Ha), 3.05 (dd,  $J = 11.6, 6.3$  Hz, 1H, 5-Hb), 2.88 (t,  $J = 7.3$  Hz, 3H, -CH<sub>2</sub>SAc, 3-H), 2.32 (s, 3H, SAc), 2.22 (dt,  $J = 12.5, 6.0$  Hz, 1H, 7-Ha), 2.09 (dt,  $J = 12.5, 7.5$  Hz, 1H, 7-Hb), 1.62-1.55 (m, 4H, -CH<sub>2</sub>CH<sub>2</sub>SAc, -OCH<sub>2</sub>CH<sub>2</sub>), 1.40-1.29 (m, 14H, -CH<sub>2</sub>-) ppm. <sup>13</sup>C NMR (125 MHz, CD<sub>3</sub>OD)  $\delta = 196.3$  (s, SC(O)CH<sub>3</sub>), 171.3 (s, CONH<sub>2</sub>), 80.8 (d, C-1), 77.2 (d, C-2), 70.1 (d, C-3), 70.0-69.8 (t, 8C, OCH<sub>2</sub>), 67.1 (d, C-7a), 61.6 (t, C-8), 58.7 (t, C-5), 47.8 (d, C-6), 35.4 (t, C-7), 29.3-25.8 (11C, t, -CH<sub>2</sub>-), q, SC(O)CH<sub>3</sub>) ppm. IR (KBr):  $\nu = 3351, 2925, 2854, 1691, 1660, 1542, 1465, 1108$  cm<sup>-1</sup>. HRMS (ESI):  $m/z$  calcd for C<sub>29</sub>H<sub>54</sub>N<sub>2</sub>O<sub>9</sub>S: 629.3448. [M+Na]<sup>+</sup>; found: 629.3485.

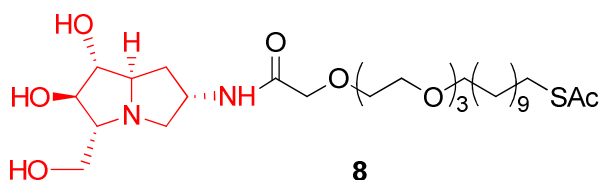



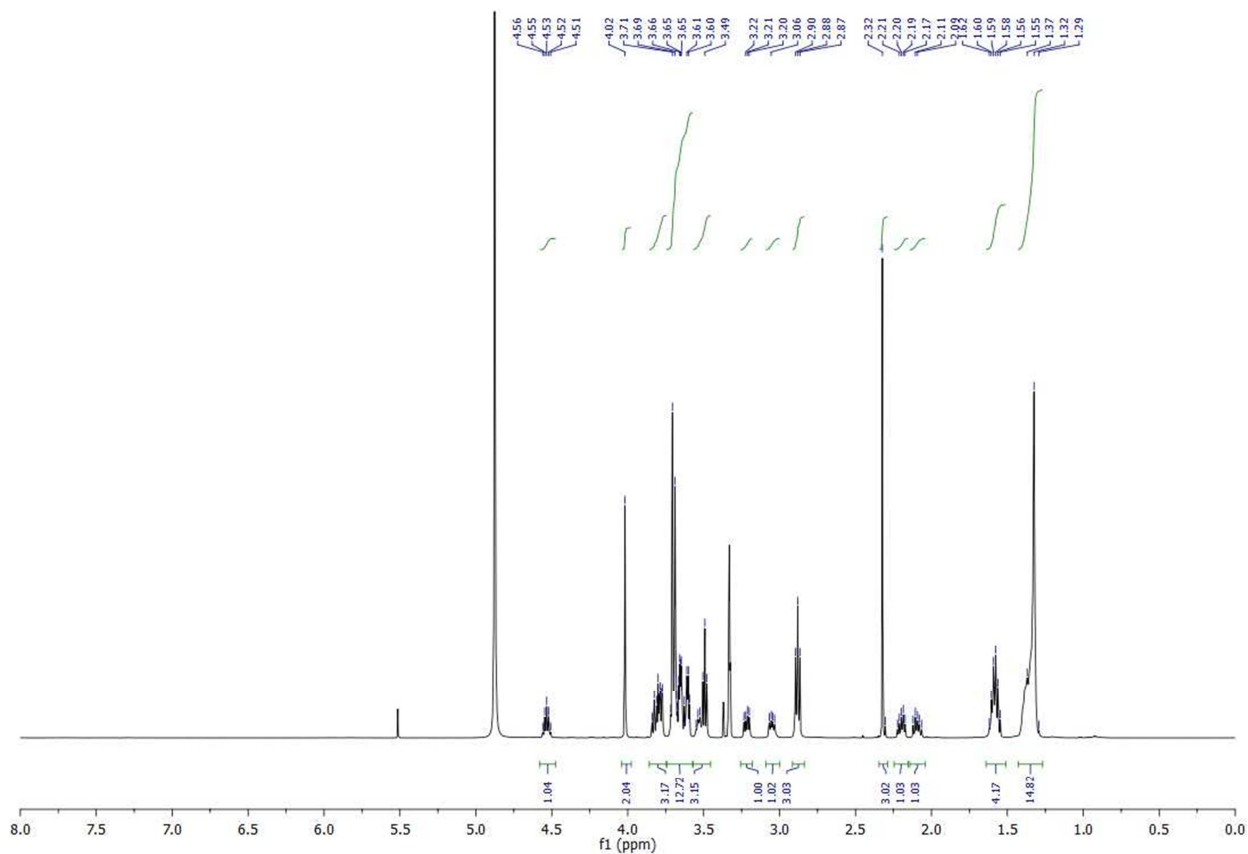

<sup>1</sup>H NMR of compound **8** (500 MHz, CD<sub>3</sub>OD)

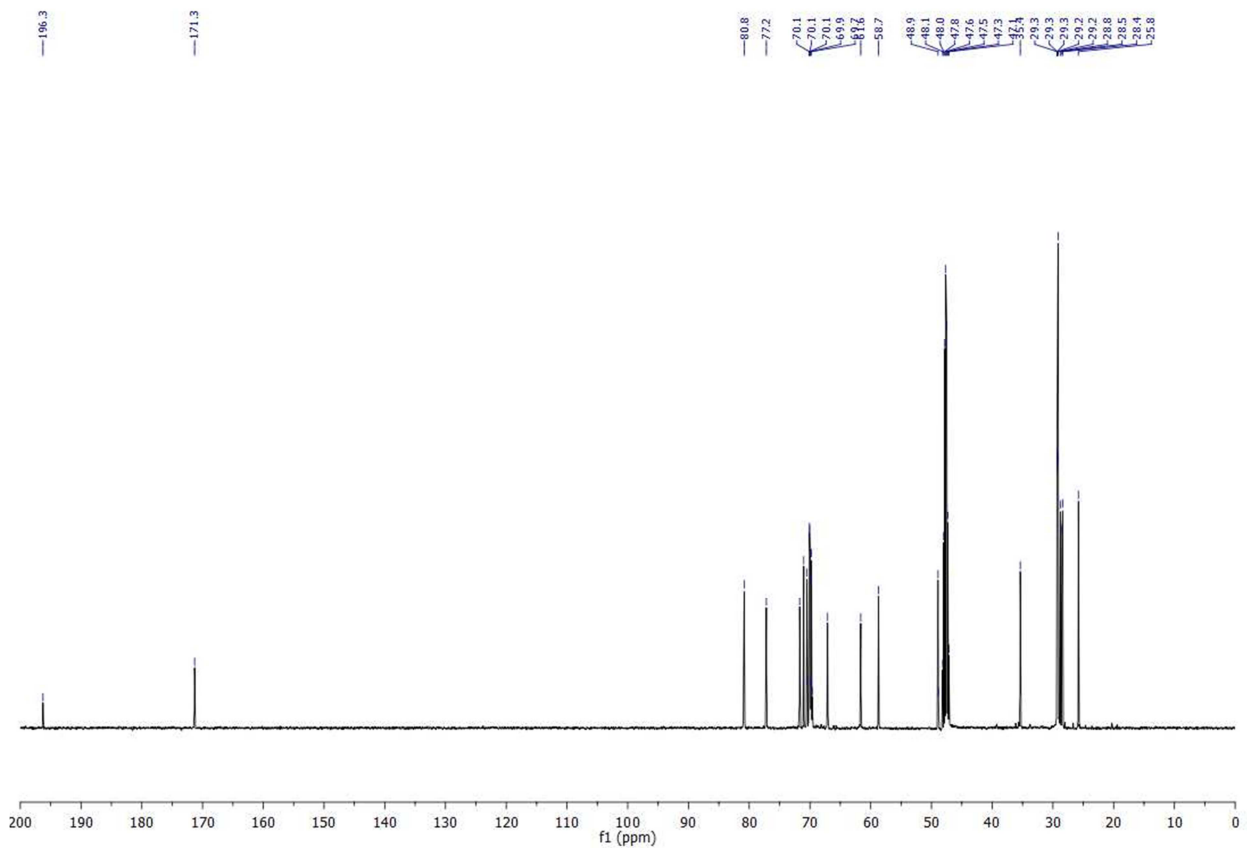

<sup>13</sup>C NMR of compound **8** (125 MHz, CD<sub>3</sub>OD)

**Synthesis of piperidine alkaloid (PIPA) derivative 9:** A solution of EDC·HCl (1-Ethyl-3-(3-dimethylaminopropyl)carbodiimide hydrochloride (32.0 mg, 168  $\mu\text{mol}$ ), 1-hydroxybenzotriazole (HOBT, 21.0 mg, 158  $\mu\text{mol}$ ) and **7** (47.0 mg, 108  $\mu\text{mol}$ ) in DMSO (0.4 mL) was left stirring for 10 min. and then added to a solution of piperidine derivative **2** (20.0 mg, 105  $\mu\text{mol}$ ) and *N,N*-diisopropylethylamine (33  $\mu\text{L}$ , 189  $\mu\text{mol}$ ) in DMSO (0.3 mL). The reaction mixture was left stirring at room temperature, under Ar atmosphere, for 65 hours, then diluted with AcOEt (10 mL) and washed with H<sub>2</sub>O (5 x 4 mL). The organic layer was then washed with water (2 x 6 mL) and brine (1 x 4 mL), dried over anhydrous Na<sub>2</sub>SO<sub>4</sub> and concentrated under vacuum. The crude was triturated with *n*-Hexane (5 x 2 mL) and then purified by column chromatography (DCM/MeOH 10:1) affording 56 mg of **9** (92  $\mu\text{mol}$ , 89% yield).  $R_f = 0.52$  (DCM/MeOH 7 : 1).  $[\alpha]_D^{29} = -12.5$  ( $c = 0.80$ , MeOH). <sup>1</sup>H NMR (500 MHz, CD<sub>3</sub>OD)  $\delta = 4.03$  (s, 2H, HNC(=O)CH<sub>2</sub>-), 3.99 (*br s*, 1H, 3-H), 3.88 (td,  $J = 7.1, 3.7$  Hz, 1H, 5-H), 3.77-3.48 (m, 17H, 1-H, OCH<sub>2</sub>, 4-H, 3'-H), 2.97-2.95 (m, 1H, 6-Ha), 2.88 (t,  $J = 7.4$  Hz, 3H, -CH<sub>2</sub>SAc, 2-Ha), 2.68-2.60 (m, 2H, 1'-H), 2.58-2.48 (m, 1H, 2-Hb), 2.32 (s, 4H, SAc, 6-Hb), 1.82 (quin, 6.8 Hz, 2H, 2'-H), 1.64-1.55 (m, 4H, -CH<sub>2</sub>CH<sub>2</sub>SAc, -OCH<sub>2</sub>CH<sub>2</sub>), 1.43-1.29 (m, 14H, -CH<sub>2</sub>-) ppm. <sup>13</sup>C NMR (125 MHz, CD<sub>3</sub>OD)  $\delta = 196.2$  (s, S(=O)CH<sub>3</sub>), 171.5 (s, CONH<sub>2</sub>), 71.1 (d, C-4), 71.0-69.8 (8 C, t, NHCOCH<sub>2</sub>O, CH<sub>2</sub>O), 69.7 (d, C-3), 68.3 (d, C-5), 54.8 (3C, t, C-2, C-6, C-1'), 36.7 (t, C-3'), 29.4-29.1 (7C, t, -CH<sub>2</sub>-), 28.8 (q, SAc), 28.5 (t, -CH<sub>2</sub>-), 25.4 (t, CH<sub>2</sub>SAc), 25.8 (t, -CH<sub>2</sub>-), 25.7 (t, C-2').ppm. IR (KBr):  $\nu = 3319, 2924, 2854, 1691, 1663, 1541, 1456, 1352, 1112$  cm<sup>-1</sup>. HRMS (ESI):  $m/z$  calcd for C<sub>29</sub>H<sub>56</sub>N<sub>2</sub>O<sub>9</sub>S: 610.3863.  $[M+2H]^+$ , found: 610.3824.

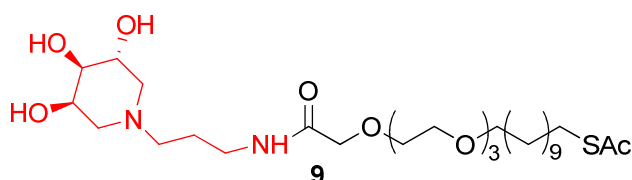

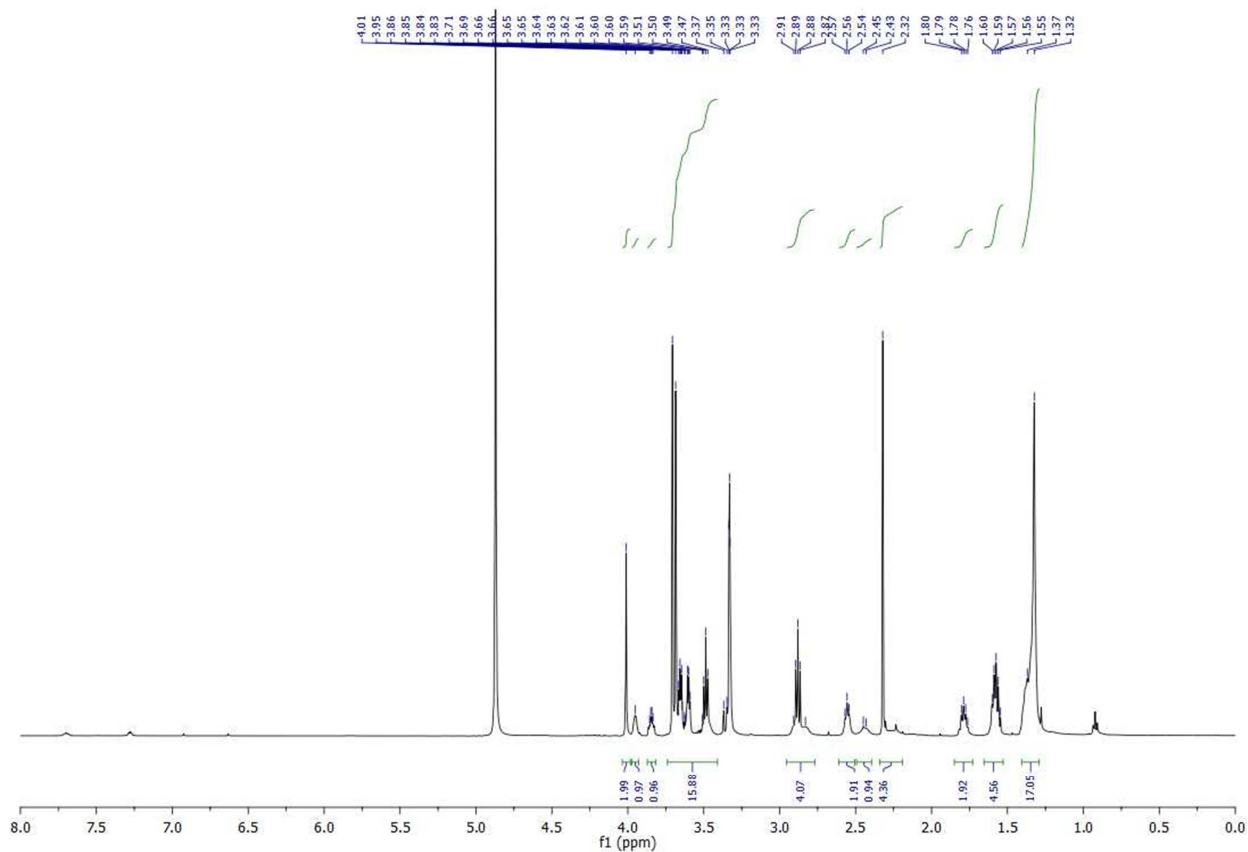

$^1\text{H}$  NMR of compound **9** (500 MHz,  $\text{CD}_3\text{OD}$ )

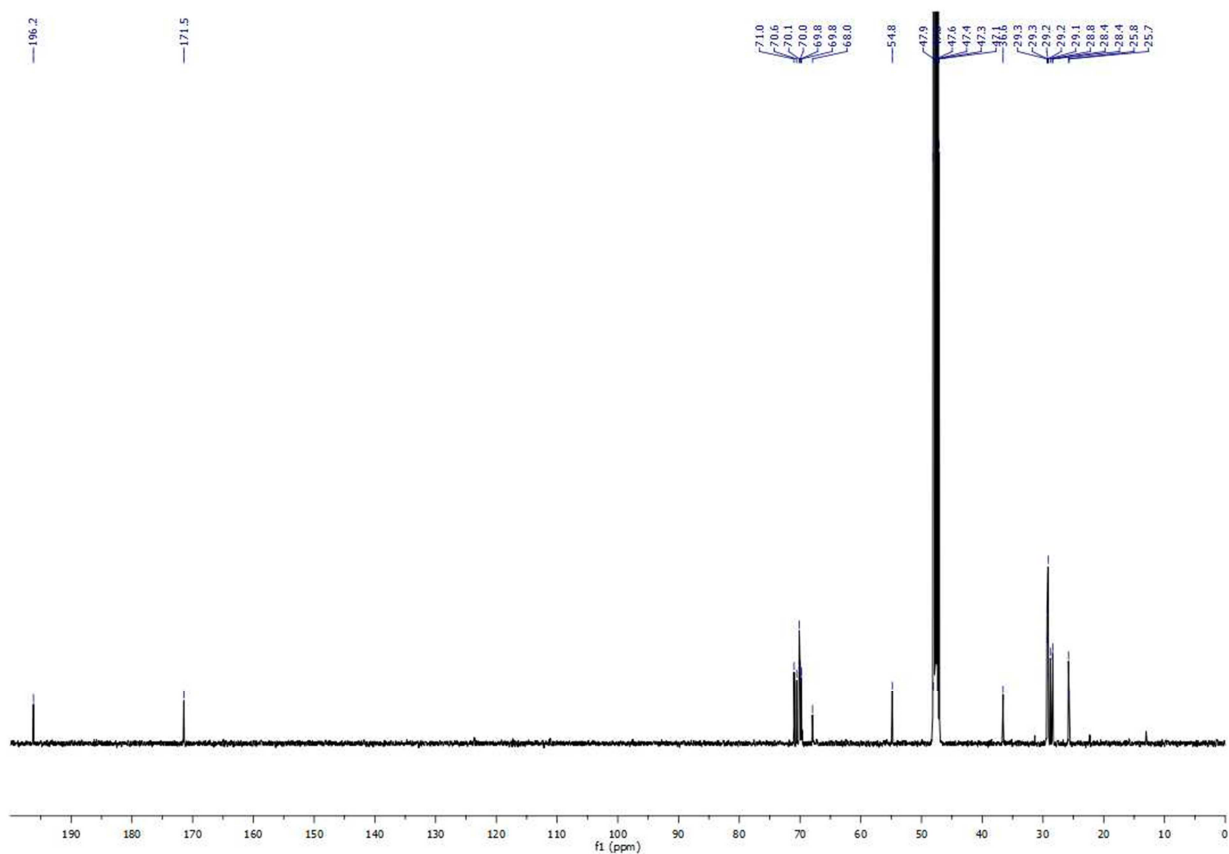

$^{13}\text{C}$  NMR of compound **9** (125 MHz,  $\text{CD}_3\text{OD}$ )

**General Procedure for the “in situ” deprotection of S-acetyl conjugates 8a and 9a:** To a 0.03 M MeOH solution of iminosugar derivative (**8** and **9**) solid CH<sub>3</sub>OMe (10 equiv.) was added and the reaction mixture was left stirring for 2 hours at 25 °C under Ar. The complete disappearance of starting material was attested via <sup>1</sup>H NMR and the crude was directly used for the preparation of PA-GNPs and PIPA-GNPs.

**Preparation and characterization of Au-GNPs:** The Au-GNPs coated with iminosugars (PA or PIPA) and simple monosaccharide βGlcC<sub>5</sub>S or αManC<sub>5</sub>S (PA-Au-GNPs **12-15** and PIPA-Au-GNPs **16-17**) were prepared by reduction of an Au(III) salt using sodium borohydride in the presence of a mixture of thiol-ending iminosugar conjugate (**8a** and **9a**) and βGlcC<sub>5</sub>S **10** or αManC<sub>5</sub>S **11**, as ligands, in different ratios following a reported procedure.<sup>1</sup> A 4:1 or a 3:2 sugar/iminosugar ligand ratio was used to prepare 20% PA-GNPs and 40% PA-GNPs, respectively. For the analysis of the ratio between the iminosugar ligands and βGlcC<sub>5</sub>S (in the case of PA-Au-βGlc or PIPA-Au-βGlc) or αManC<sub>5</sub>S (in the case of PA-Au-αMan) ligands, <sup>1</sup>H NMR spectra of the initial mixture and of the supernatant after Au-GNPs formation were recorded. The ligands loading on the PA-Au-GNPs and PIPA-Au-GNPs was also evaluated by quantitative NMR (qNMR) using 3-(trimethylsilyl)propionic-2,2,3,3-*d*<sub>4</sub> acid (TSP-*d*<sub>4</sub>) as an internal standard in the D<sub>2</sub>O solution of the PA-Au-GNPs or PIPA-Au-GNPs. The prepared PA-Au-GNPs and PIPA-Au-GNPs were freeze-dried and stored at 4 °C. In these conditions, the Au- GNPs can be stored for months maintaining their biophysical properties. The Au-GNPs coated only with simple monosaccharide **18** and **19** were also prepared as previously described.<sup>1</sup>

**General Procedure for the preparation of Au-GNPs coated with iminosugars:** An aqueous solution of HAuCl<sub>4</sub> (25 mM, 1 equiv.) was added to a 12 mM methanolic solution of a suitable mixture of thiol-ending sugar and iminosugar conjugates (3 equiv. overall). An aqueous solution of NaBH<sub>4</sub> (1 M, 27 equiv.) was then added in four portions, with vigorous shaking. The black suspension formed was shaken for 2 hours at 25 °C. After that, the supernatant was removed and analysed by <sup>1</sup>H NMR to study the nanoparticle ligands composition. The residue was washed several times with MeOH. In order to well separate the nanoparticles from the supernatant a centrifugation (4000 xg, 10 °C, 2 min) is required in some cases. The residue was dissolved in a minimal volume of HPLC Gradient grade water and purified by dialysis (SnakeSkin® Pleated Dialysis Tubing, 10,000 MWCO). Iminosugar coated Au-GNPs were obtained as a dark-brown powder after freeze-drying and characterized via <sup>1</sup>H NMR, UV-Vis Spectroscopy and TEM analysis. The average number of gold atoms was calculated on the basis of the average diameter obtained by TEM micrographs<sup>2</sup> and molecular formulas of the Au-GNPs were estimated according to previous work.<sup>1</sup>

---

<sup>2</sup> M. J. Hostetler, J. E. Wingate, C.-J. Zhong, J. E. Harris, R. W. Vachet, M. R. Clark, J. D. Londono, S. J. Green, J. J. Stokes, G. D. Wignall, G. L. Glish, M. D. Porter, N. D. Evans, R. W. Murray, *Langmuir* **1998**, *14*, 17– 30.

**Preparation of 20% PA-βGlc NPs (12):** A 1:4 mixture of thiol-ending PA conjugate **8a** (7.5 mg, 13.2 μmol) and βGlcC<sub>5</sub>S **10** (14.6 mg, 51.7 μmol) in MeOH (5.4 mL) was used, to afford 5.6 mg of **12** (98% yield in Au). TEM (average diameter): 1.3 ±0.3 nm (main population, >85%). Quantitative <sup>1</sup>H NMR (500 MHz, D<sub>2</sub>O containing 0.05 wt. % of 3-(trimethylsilyl)propionic-2,2,3,3-d<sub>4</sub> acid, sodium salt as an internal standard): 0.58 mg of PA-GNPs were dissolved in 180 μL of D<sub>2</sub>O and 40 μL of D<sub>2</sub>O containing 0.05 wt.% TSP were added and 38 nmoles of PA conjugate were found.<sup>3</sup> Significant peaks: δ = 4.36 (br s, from βGlcC<sub>5</sub>S), 4.00 (s, NHCOCH<sub>2</sub>- from PA conjugate), 3.84-3.22 (m), 3.05-2.97 (m, from PA conjugate), 2.78-2.66 (m, from PA conjugate), 2.15-1.14 (m); ratio between PA conjugate and βGlcC<sub>5</sub>S signals ≈1: 4.6. This result is in fair agreement with the molar ratio of conjugates per nanoparticle (20% of PA conjugate and 80% of βGlcC<sub>5</sub>S) as estimated by NMR analysis of the ligand mixture before and after nanoparticles formation. IR (KBr): ν ~ 3388, 2921, 2852, 1635 (amide), 1383, 1077 cm<sup>-1</sup>. UV/Vis (H<sub>2</sub>O, 0.05 and 0.10 mg/mL): λ =516 nm (gold surface plasmon band). Estimated average molecular weight for (C<sub>27</sub>H<sub>51</sub>N<sub>2</sub>O<sub>8</sub>S)<sub>3</sub>(C<sub>11</sub>H<sub>21</sub>O<sub>6</sub>S)<sub>27</sub>Au<sub>140</sub>: ~37.0 KDa.

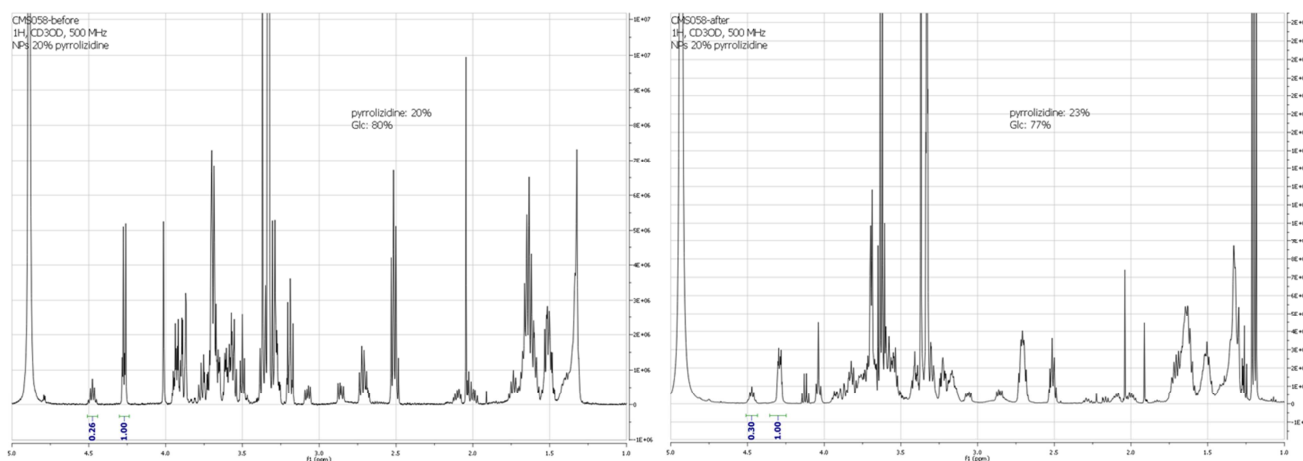

<sup>1</sup>H NMR of sugar/iminosugar ligands mixture before and after formation of Au-GNPs **12** (500 MHz, CD<sub>3</sub>OD).

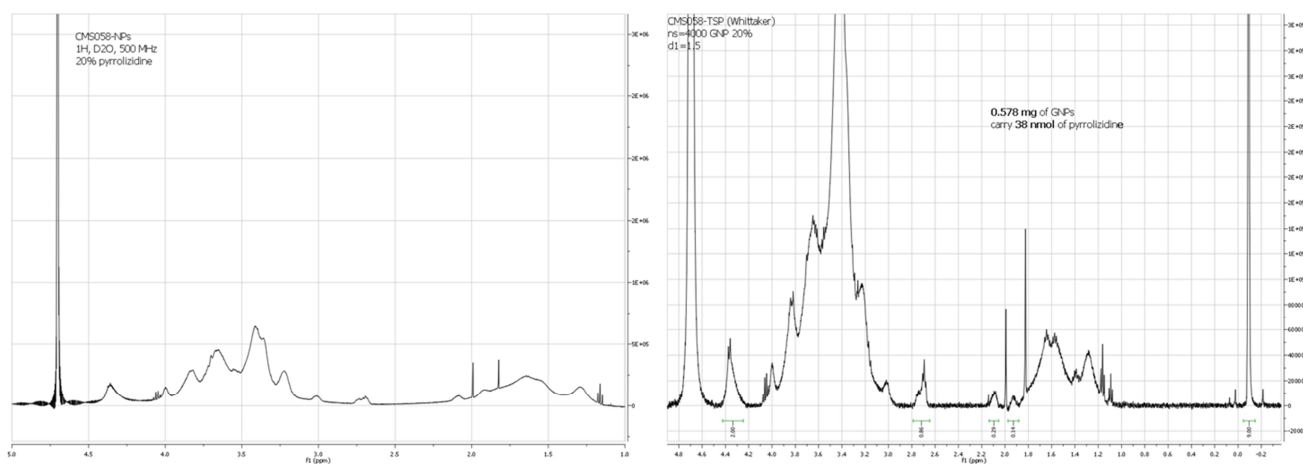

<sup>1</sup>H NMR and <sup>1</sup>H qNMR with TSP-d<sub>4</sub> of Au-GNPs **12** (500 MHz, D<sub>2</sub>O).

<sup>3</sup> In the quantitative NMR (qNMR) the **7-Ha** proton signal of PA-conjugate was selected for integration as it falls in a spectral region free of other signals.

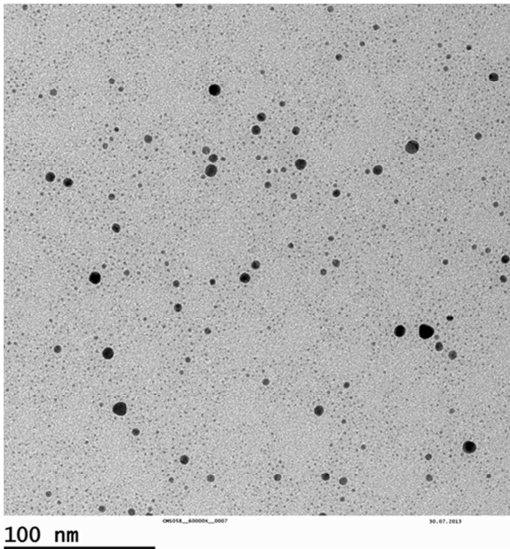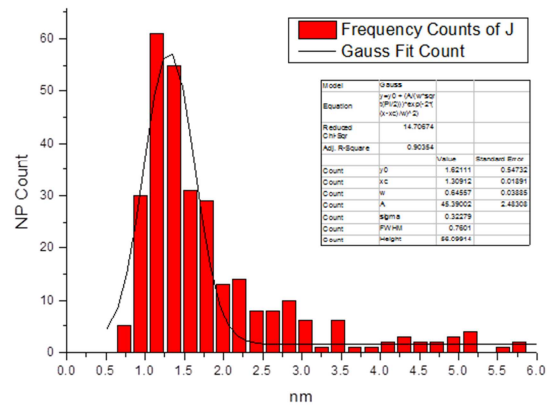

TEM micrograph in H<sub>2</sub>O and size-distribution histogram obtained by measuring 300 nanoparticles (average diameter  $1.3 \pm 0.3$  nm, 13% shows a >3 nm diameter).

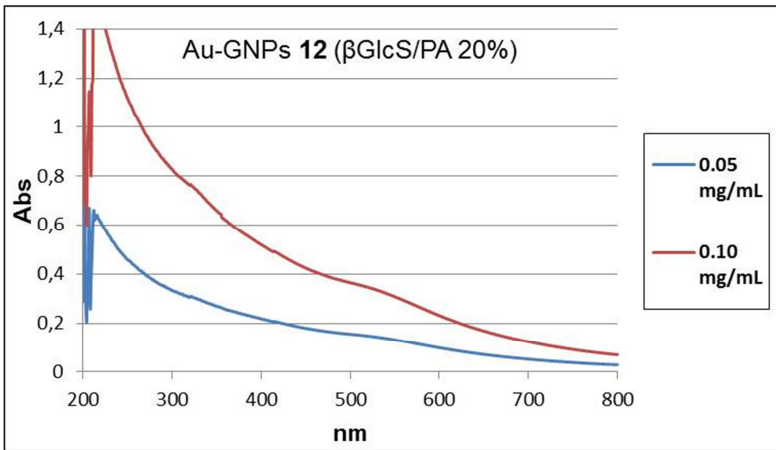

UV/vis spectra of H<sub>2</sub>O solution of Au-GNPs 12 recorded at two different concentrations.

**Preparation of 40% PA-βGlc NPs (13):** A 2:3 mixture of thiol-ending PA conjugate **8a** (3.7 mg, 6.6 μmol) and βGlcC<sub>5</sub>S **10** (2.8 mg, 9.9 μmol) in MeOH (1.4 mL) was used, to afford 1.1 mg of **13** (77% yield in Au). TEM (average diameter): 1.4±0.4 nm. Quantitative <sup>1</sup>H NMR (500 MHz, D<sub>2</sub>O containing 0.05 wt. % of 3-(trimethylsilyl)propionic-2,2,3,3-*d*<sub>4</sub> acid, sodium salt as an internal standard): 0.32 mg of PA-GNPs were dissolved in 180 μL of D<sub>2</sub>O and 25 μL of D<sub>2</sub>O containing 0.05 wt.% TSP were added and 56 nmoles of PA conjugate were found.<sup>3</sup> Significant peaks: δ = 4.50-4.36 (m, from PA conjugate), 3.99 (s, NHCOCH<sub>2</sub>- from PA conjugate), 3.84-3.14 (m), 3.07-2.97 (m, from PA conjugate), 2.77-2.65 (m, from PA conjugate), 2.15-2.03 (m, from PA conjugate), 1.97-1.87 (m, from PA conjugate), 1.81-1.01 (m); ratio between PA conjugate and βGlcC<sub>5</sub>S signals is impossible to define since the βGlcC<sub>5</sub>S anomeric signal disappeared from the spectrum; this phenomenon is in agreement with the literature<sup>1</sup> and it is probably due to the fact that at this densities the long active ligand folds and collapse on the glucose shell hampering a proper proton relaxation.<sup>4</sup> IR (KBr): ν ~3419, 2922, 2853, 1663, 1631, 1600 (amide), 1383, 1108 cm<sup>-1</sup>. UV/Vis (H<sub>2</sub>O, 0.05, 0.10 and 0.20 mg/mL): maximum absorption at 520 nm (gold surface plasmon band) not observed. Estimated average molecular weight for (C<sub>27</sub>H<sub>51</sub>N<sub>2</sub>O<sub>8</sub>S)<sub>9</sub>(C<sub>11</sub>H<sub>21</sub>O<sub>6</sub>S)<sub>14</sub>Au<sub>140</sub>: ~36.5 kDa.

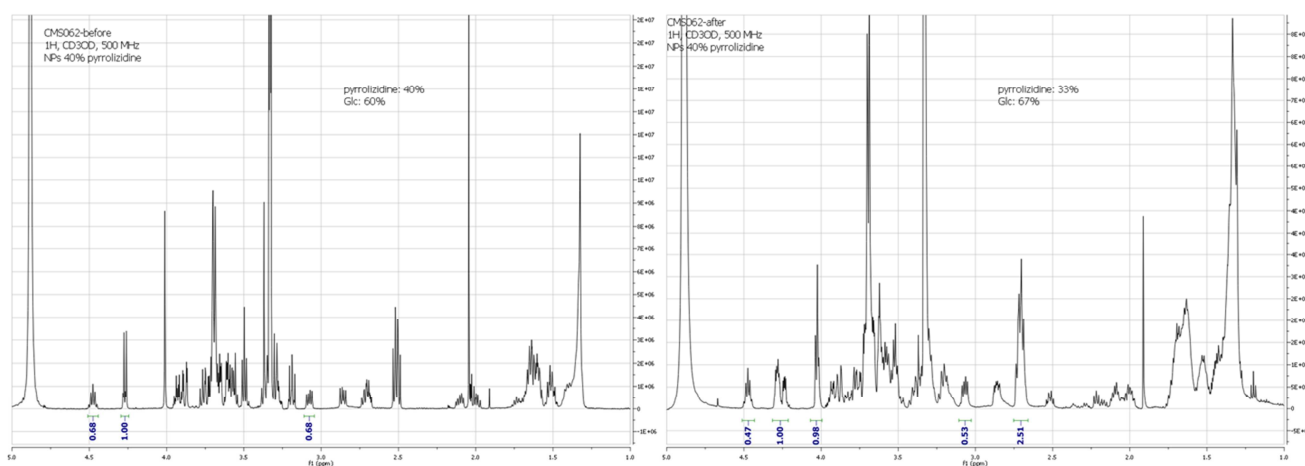

<sup>1</sup>H NMR of sugar/iminosugar ligands mixture before and after formation of Au-GNPs **13** (500 MHz, CD<sub>3</sub>OD).

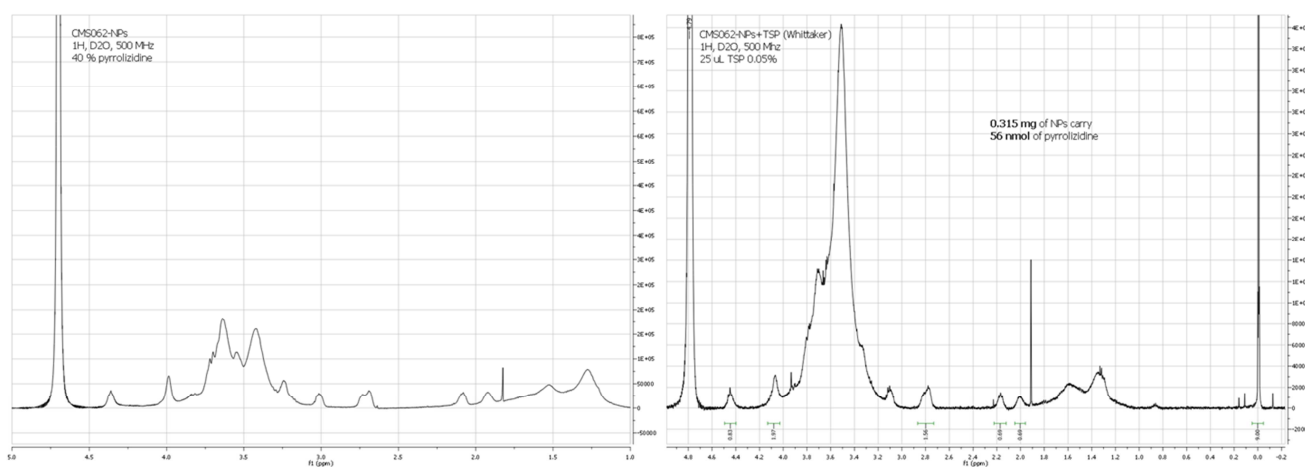

<sup>1</sup>H NMR and <sup>1</sup>H qNMR with TSP-*d*<sub>4</sub> of Au-GNPs **13** (500 MHz, D<sub>2</sub>O).

<sup>4</sup> M. Reynolds, M. Marradi, A. Imberty, S. Penades, S. Perez, *Chem. Eur. J.* **2012**, *18*, 4264-4273.



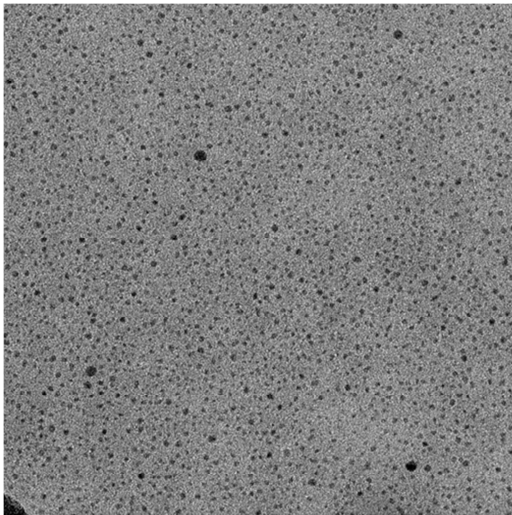

50 nm

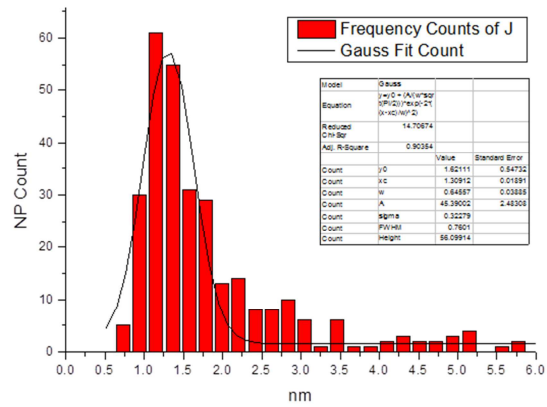

TEM micrograph in H<sub>2</sub>O and size-distribution histogram obtained by measuring 300 nanoparticles (average diameter  $1.4 \pm 0.4$  nm, 2% shows a >3 nm diameter).

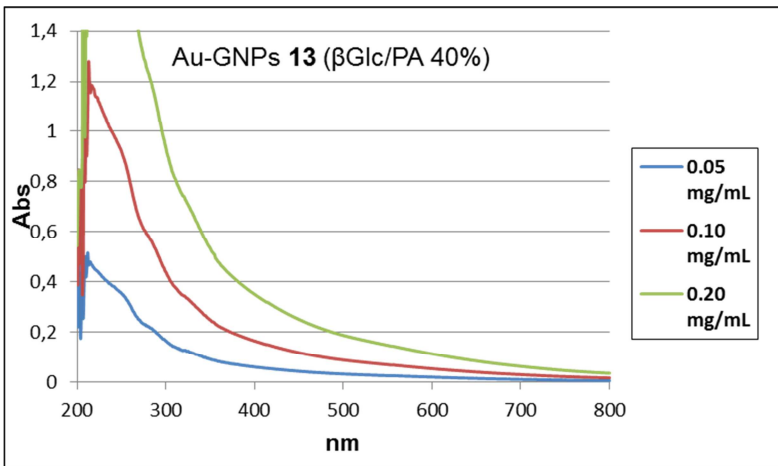

UV/vis spectra of H<sub>2</sub>O solution of Au-GNPs **13** recorded at three different concentrations.



**Preparation of 20% PA- $\alpha$ Man NPs (**14**):** A 1:4 mixture of thiol-ending PA conjugate **8a** (4.7 mg, 8.2  $\mu$ mol) and  $\alpha$ ManC<sub>5</sub>S **11** (9.3 mg, 33.0  $\mu$ mol) in MeOH (3.4 mL) was used, to afford 4.4 mg of **14** (96% yield in Au). TEM (average diameter): 1.9 $\pm$ 0.4 nm. Quantitative <sup>1</sup>H NMR (500 MHz, D<sub>2</sub>O containing 0.05 wt. % of 3-(trimethylsilyl)propionic-2,2,3,3-*d*<sub>4</sub> acid, sodium salt as an internal standard): 0.60 mg of PA-GNPs were dissolved in 180  $\mu$ L of D<sub>2</sub>O and 25  $\mu$ L of D<sub>2</sub>O containing 0.05 wt.% TSP were added and 38 nmoles of PA conjugate were found.<sup>3</sup> Significant peaks:  $\delta$  = 4.41-4.32 (m, from PA conjugate), 4.00 (s, NHCOCH<sub>2</sub>- from PA conjugate), 3.96-3.19 (m), 3.05-2.98 (m, from PA conjugate), 2.78-2.65 (m, from PA conjugate), 2.19-1.06 (m); ratio between PA conjugate and  $\alpha$ ManC<sub>5</sub>S signals is impossible to define since the  $\alpha$ ManC<sub>5</sub>S anomeric signal is covered by the solvent residual peak. IR (KBr):  $\nu$  ~3368, 2922, 2848, 1675, 1633 (amide), 1447, 1092 cm<sup>-1</sup>. UV/Vis (H<sub>2</sub>O, 0.05 and 0.10 mg/mL):  $\lambda$ =528 nm (gold surface plasmon band). Estimated average molecular weight for (C<sub>27</sub>H<sub>51</sub>N<sub>2</sub>O<sub>8</sub>S)<sub>4</sub>(C<sub>11</sub>H<sub>21</sub>O<sub>6</sub>S)<sub>19</sub>Au<sub>140</sub>: ~35 kDa.

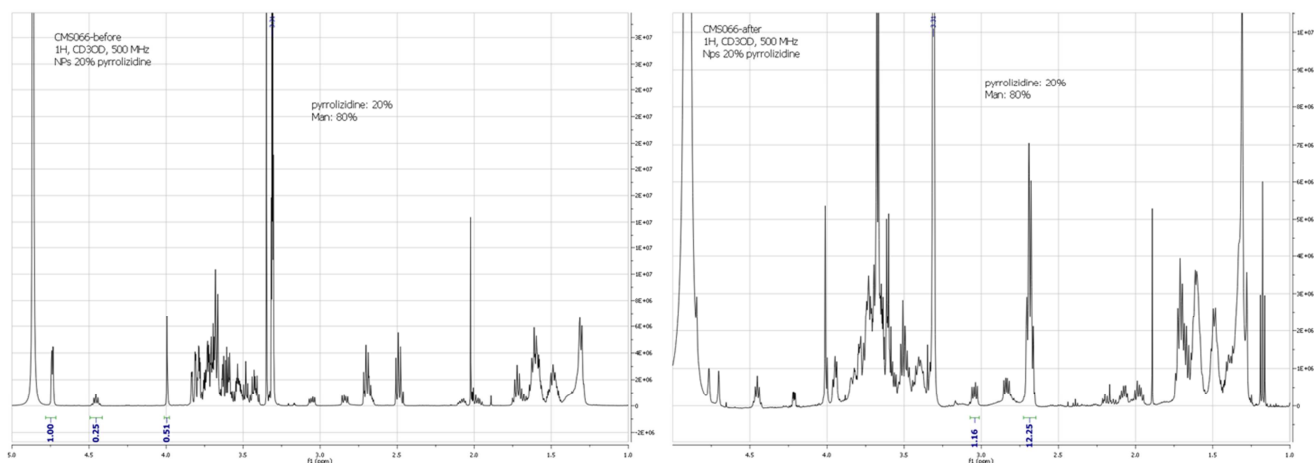

<sup>1</sup>H NMR of sugar/iminosugar ligands mixture before and after formation of Au-GNPs **14** (500 MHz, CD<sub>3</sub>OD).

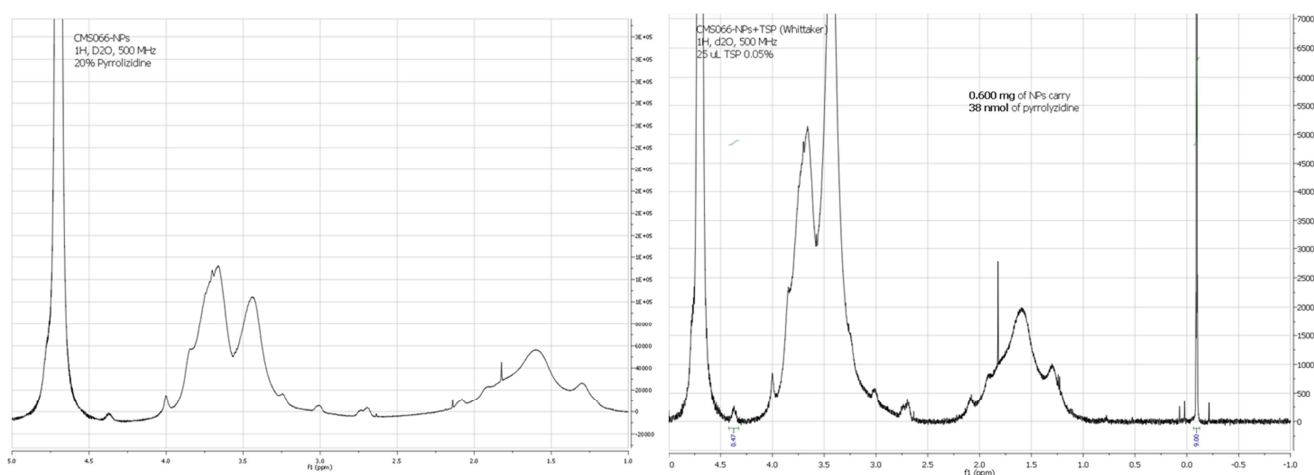

<sup>1</sup>H NMR and <sup>1</sup>H qNMR with TSP-*d*<sub>4</sub> of Au-GNPs **14** (500 MHz, D<sub>2</sub>O).

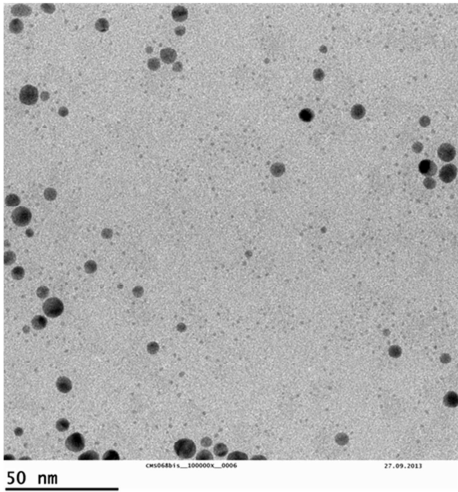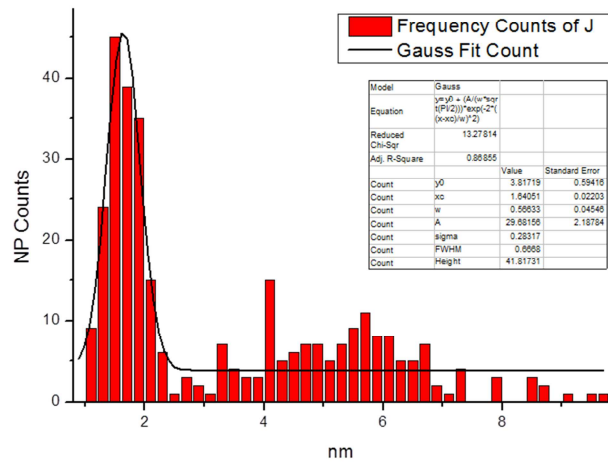

TEM micrograph in H<sub>2</sub>O and size-distribution histogram obtained by measuring 300 nanoparticles (average diameter  $1.9 \pm 0.4$  nm).

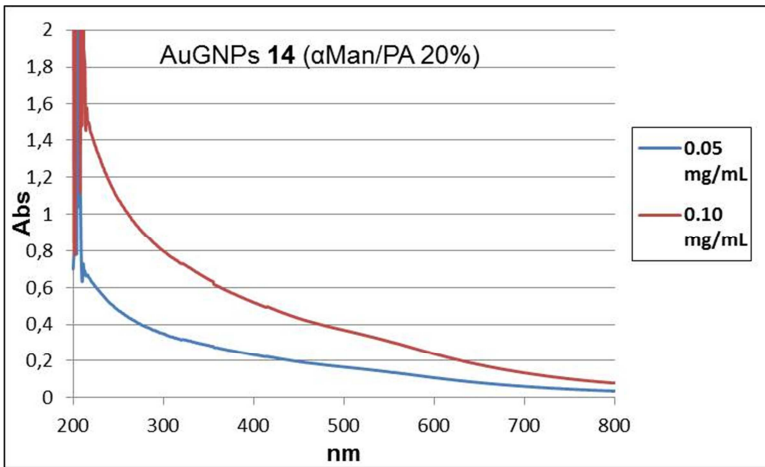

UV/vis spectra of H<sub>2</sub>O solution of Au-GNPs **14** recorded at two different concentrations.

**Preparation of 40% PA- $\alpha$ Man NPs (**15**):** A 2:3 mixture of thiol-ending PA conjugate **8a** (6.0 mg, 9.9  $\mu$ mol) and  $\alpha$ ManC<sub>5</sub>S **11** (4.2 mg, 14.8  $\mu$ mol) in MeOH (2.0 mL) was used, to afford 1.8 mg of **15** (84% yield in Au). TEM (average diameter): 1.2 $\pm$ 0.2 nm. Quantitative <sup>1</sup>H NMR (500 MHz, D<sub>2</sub>O containing 0.05 wt. % of 3-(trimethylsilyl)propionic-2,2,3,3-*d*<sub>4</sub> acid, sodium salt as an internal standard): 0.33 mg of PA-GNPs were dissolved in 180  $\mu$ L of D<sub>2</sub>O and 25  $\mu$ L of D<sub>2</sub>O containing 0.05 wt.% TSP were added and 79 nmoles of PA conjugate were found.<sup>3</sup> Significant peaks:  $\delta$  = 4.43-4.29 (m, from PA conjugate), 3.99 (s, NHCOCH<sub>2</sub>- from PA conjugate), 3.85-3.18 (m), 3.05-2.95 (m, from PA conjugate), 2.78-2.61 (m, from PA conjugate), 2.14-2.02 (m, from PA conjugate), 1.97-1.84 (m, from PA conjugate), 1.72-0.74 (m); ratio between PA conjugate and  $\alpha$ ManC<sub>5</sub>S signals is impossible to define since the  $\alpha$ ManC<sub>5</sub>S anomeric signal is covered by the solvent residual peak. IR (KBr):  $\nu$  ~ 3418, 2924, 2856, 1660, 1628, 1437, 1383, 1093, 1064 cm<sup>-1</sup>. UV/Vis (H<sub>2</sub>O, 0.05 and 0.10 mg/mL): maximum absorption at 520 nm (gold surface plasmon band) not observed. Estimated average molecular weight for (C<sub>27</sub>H<sub>51</sub>N<sub>2</sub>O<sub>8</sub>S)<sub>9</sub>(C<sub>11</sub>H<sub>21</sub>O<sub>6</sub>S)<sub>14</sub>Au<sub>140</sub>: ~36.5 kDa.

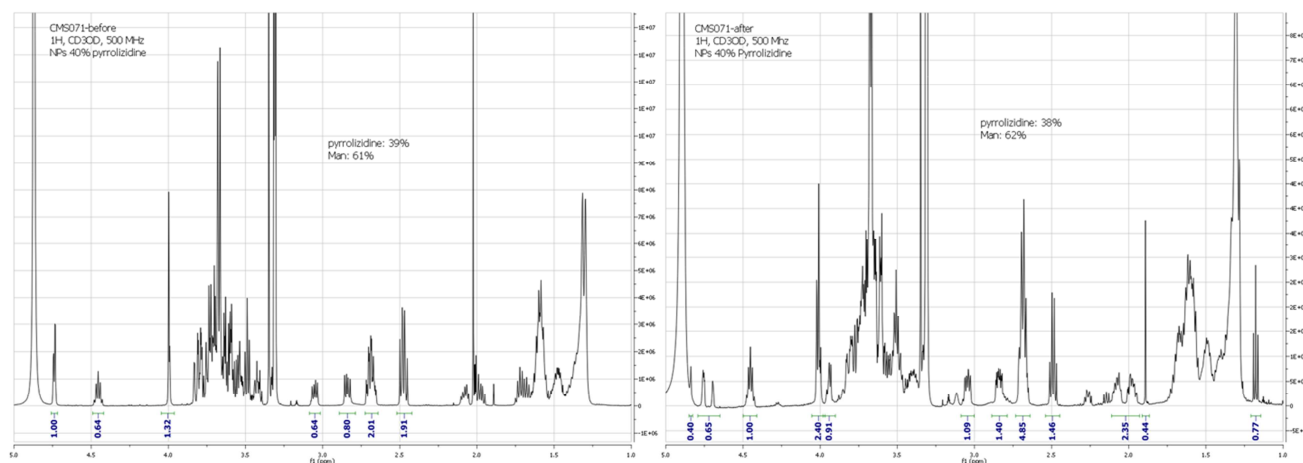

<sup>1</sup>H NMR of sugar/iminosugar ligands mixture before and after formation of Au-GNPs **15** (500 MHz, CD<sub>3</sub>OD).

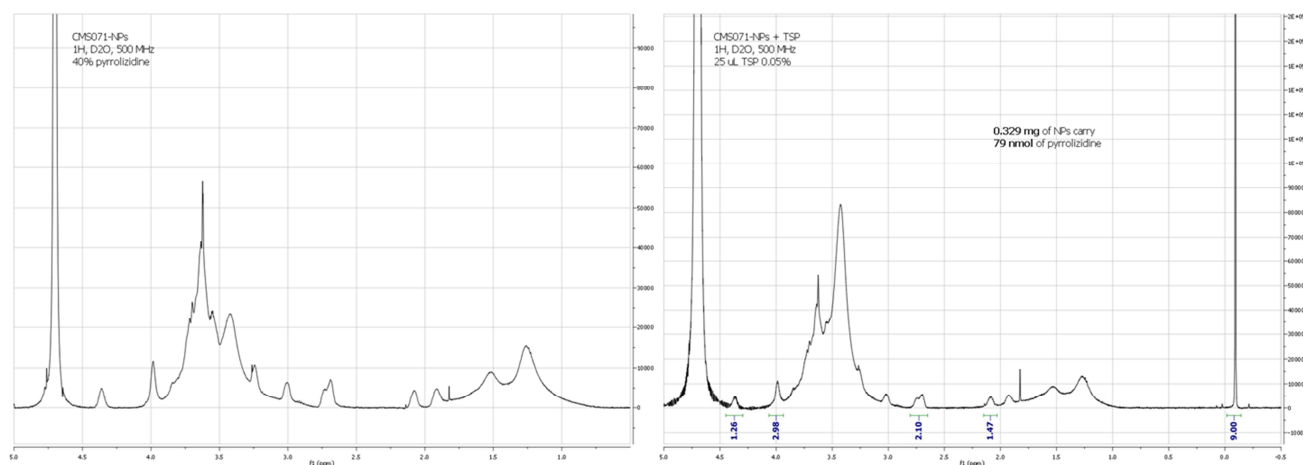

<sup>1</sup>H NMR and <sup>1</sup>H qNMR with TSP-*d*<sub>4</sub> of Au-GNPs **15** (500 MHz, D<sub>2</sub>O).

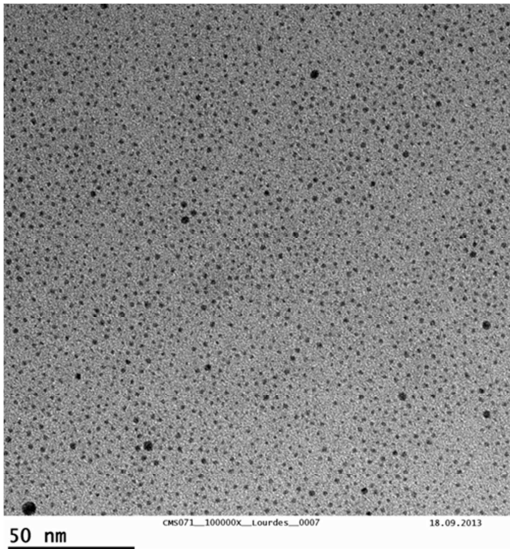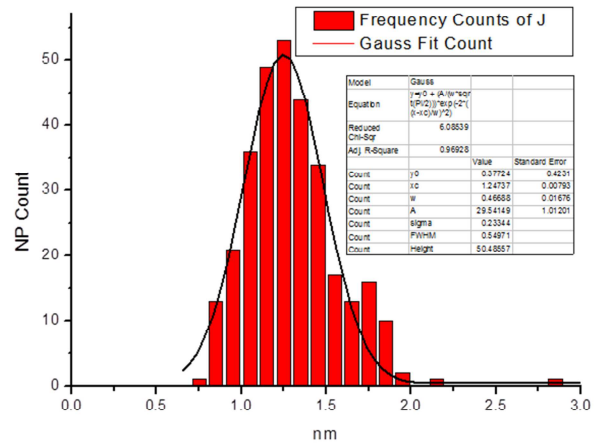

TEM micrograph in H<sub>2</sub>O and size-distribution histogram obtained by measuring 300 nanoparticles (average diameter 1.2 ± 0.2 nm).

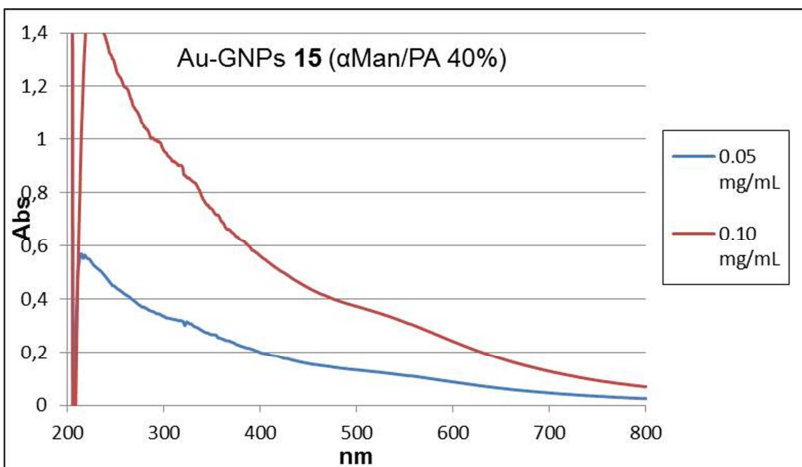

UV/vis spectra of H<sub>2</sub>O solution of Au-GNPs **15** recorded at two different concentrations.

**Preparation of 20% PIPA-βGlc NPs (16):** A 1:4 mixture of thiol-ending PIPA conjugate **9a** (3.1 mg, 5.5 μmol) and βGlcC<sub>5</sub>S **10** (6.0 mg, 21.3 μmol) in MeOH (5.4 mL) was used, to afford 1.6 mg of **16** (64% yield in Au). TEM (average diameter): 1.6 ±0.3 nm. Quantitative <sup>1</sup>H NMR (500 MHz, D<sub>2</sub>O containing 0.05 wt. % of 3-(trimethylsilyl)propionic-2,2,3,3-*d*<sub>4</sub> acid, sodium salt as an internal standard): 0.32 mg of PIPA-GNPs were dissolved in 180 μL of D<sub>2</sub>O and 25 μL of D<sub>2</sub>O containing 0.05 wt.% TSP were added and 56 nmoles of PA conjugate were found.<sup>5</sup> Significant peaks: δ = 4.34 (br s, from βGlcC<sub>5</sub>S), 3.99 (s, NHCOCH<sub>2</sub>- from PIPA conjugate), 3.94-2.98 (m), 2.94-2.75 (m, from PIPA conjugate), 2.52-2.22 (m, from PIPA conjugate), 2.18-1.99 (m, from PIPA conjugate), 1.82-0.72 (m). IR (KBr): ν ~ 3424, 2920, 2848, 1637 (amide), 1438, 1381, 1076 cm<sup>-1</sup>. UV/Vis (H<sub>2</sub>O, 0.05 and 0.10 mg/mL): λ =514 nm (gold surface plasmon band). Estimated average molecular weight for (C<sub>26</sub>H<sub>51</sub>N<sub>2</sub>O<sub>8</sub>S)<sub>7</sub>(C<sub>11</sub>H<sub>21</sub>O<sub>6</sub>S)<sub>28</sub>Au<sub>140</sub>: ~39.0 KDa. In this case a 20% of PIPA conjugate match perfectly with the quantitative analysis, albeit a 15% amount of PIPA conjugate was attested by the NMR analysis of the ligand mixture before and after nanoparticle formation.

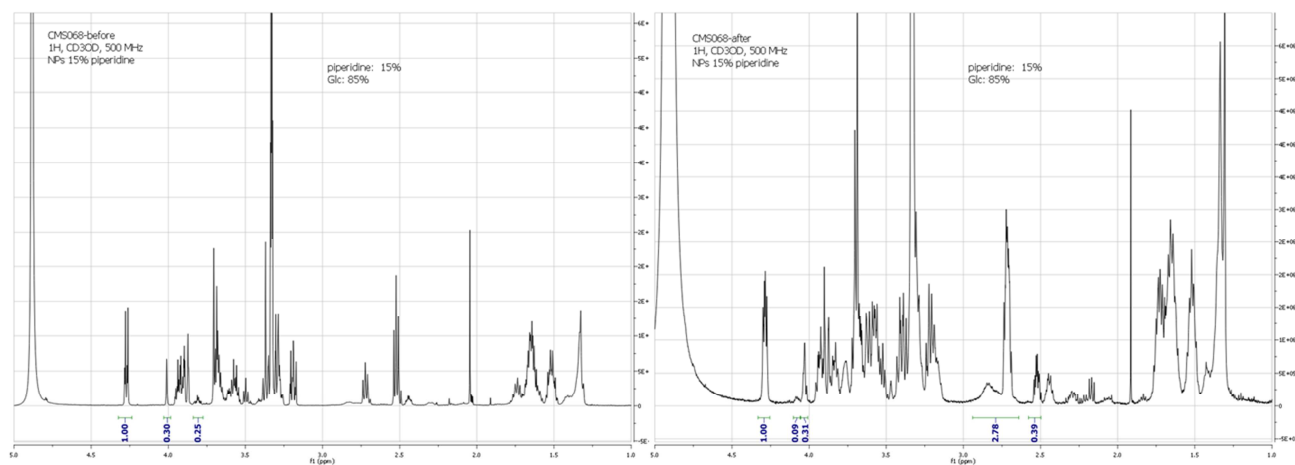

<sup>1</sup>H NMR of sugar/iminosugar ligands mixture before and after formation of Au-GNPs **16** (500 MHz, CD<sub>3</sub>OD).

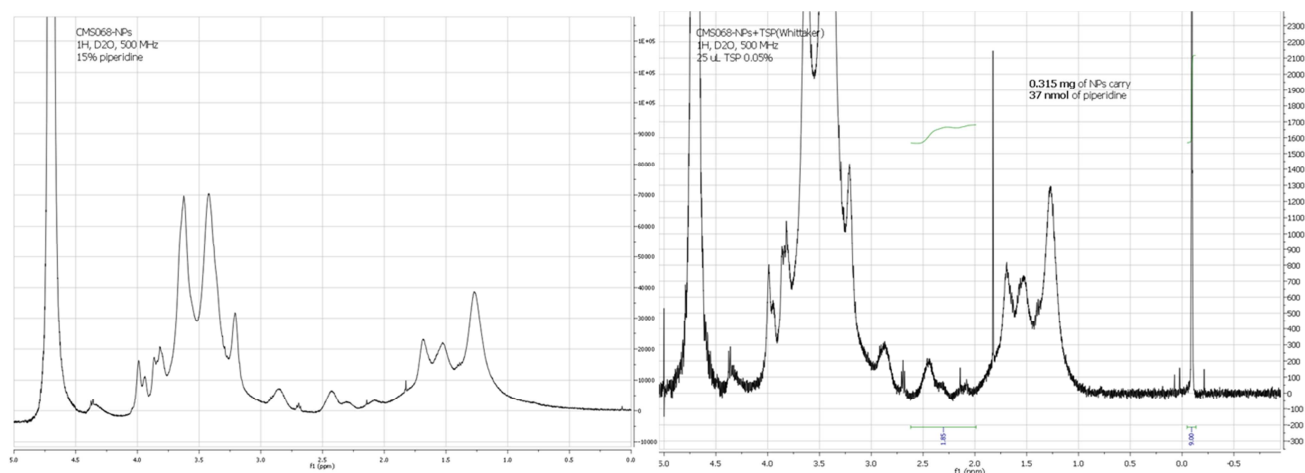

<sup>1</sup>H NMR and <sup>1</sup>H qNMR with TSP-*d*<sub>4</sub> of Au-GNPs **16** (500 MHz, D<sub>2</sub>O).

<sup>5</sup> In the quantitative NMR (qNMR) the multiplet corresponding to **1'-H**, **2-Hb** and **6-Hb** proton signals (δ = 2.65-2.02 ppm, 4H) of PIPA-conjugate, was selected for integration as it falls in a spectral region free of other signals.

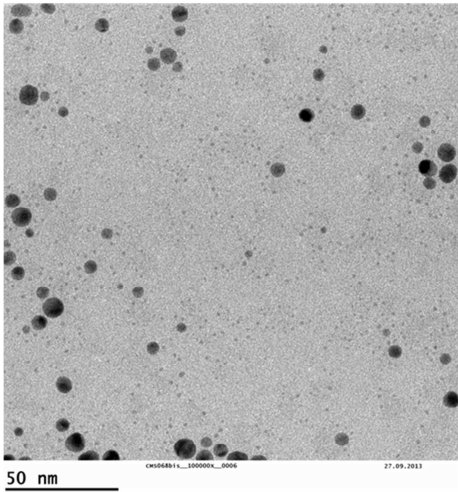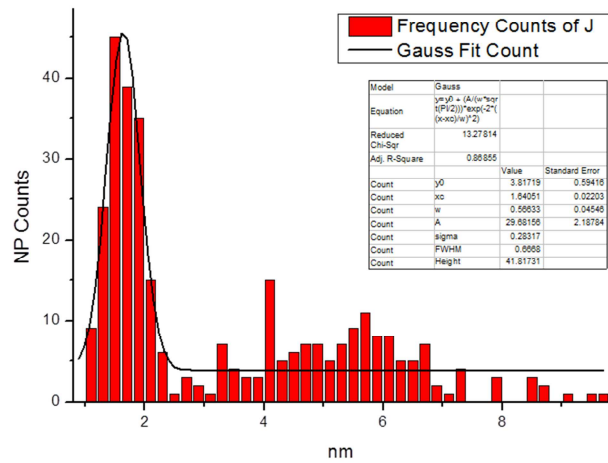

TEM micrograph in H<sub>2</sub>O and size-distribution histogram obtained by measuring 300 nanoparticles (average diameter 1.6 ± 0.3 nm, 45% shows a >3 nm diameter).

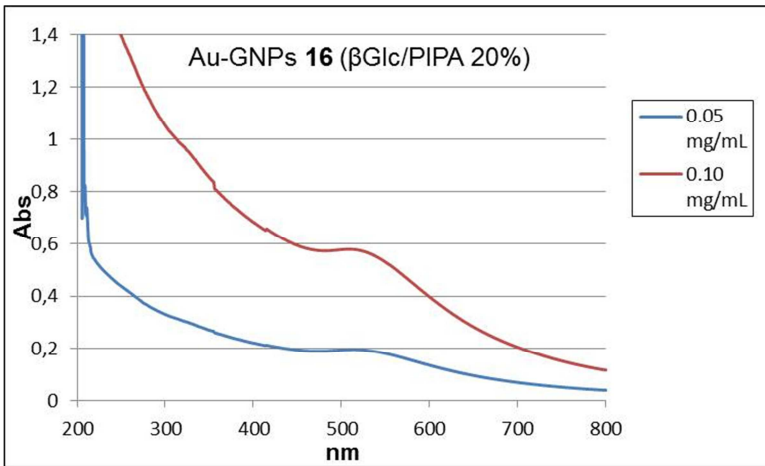

UV/vis spectra of H<sub>2</sub>O solution of Au-GNPs 16 recorded at two different concentrations.



**Preparation of 40% PIPA-βGlc NPs (17):** A 2:3 mixture of thiol-ending PA conjugate **9a** (3.7 mg, 6.5 μmol) and βGlcC<sub>5</sub>S **10** (2.8 mg, 9.8 μmol) in MeOH (1.4 mL) was used, to afford 1.1 mg of **17** (77% yield in Au). TEM (average diameter): 1.7±0.4 nm. Quantitative <sup>1</sup>H NMR (500 MHz, D<sub>2</sub>O containing 0.05 wt. % of 3-(trimethylsilyl)propionic-2,2,3,3-*d*<sub>4</sub> acid, sodium salt as an internal standard): 0.33 mg of PIPA-GNPs were dissolved in 180 μL of D<sub>2</sub>O and 25 μL of D<sub>2</sub>O containing 0.05 wt.% TSP were added and 71 nmoles of PA conjugate were found. Significant peaks: δ = 4.50-4.36 (m, from PA conjugate), 3.99 (s, NHCOCH<sub>2</sub>- from PIPA conjugate), 3.91 (*br s* from PIPA conjugate), 3.80-3.30 (m), 3.56 (q, Et<sub>2</sub>O), 3.27 (s, MeOH), 3.25-3.17 (m, from PIPA conjugate), 3.06-2.82 (m, from PIPA conjugate), 2.70-2.45 (m, from PIPA conjugate), 1.82-1.20 (m), 1.16 (t, Et<sub>2</sub>O); ratio between PA conjugate and βGlcC<sub>5</sub>S signals is impossible to define since the βGlcC<sub>5</sub>S anomeric signal disappeared from the spectrum; see comment on **13**.<sup>4</sup> IR (KBr): ν ~3436, 2920, 2856, 1631 (amide), 1392, 1364, 1033 cm<sup>-1</sup>. UV/Vis (H<sub>2</sub>O, 0.05, 0.10 and 0.20 mg/mL): maximum absorption at 520 nm (gold surface plasmon band) not observed. Estimated average molecular weight for (C<sub>26</sub>H<sub>51</sub>N<sub>2</sub>O<sub>8</sub>S)<sub>9</sub>(C<sub>11</sub>H<sub>21</sub>O<sub>6</sub>S)<sub>14</sub>Au<sub>140</sub>: ~36.5 kDa.

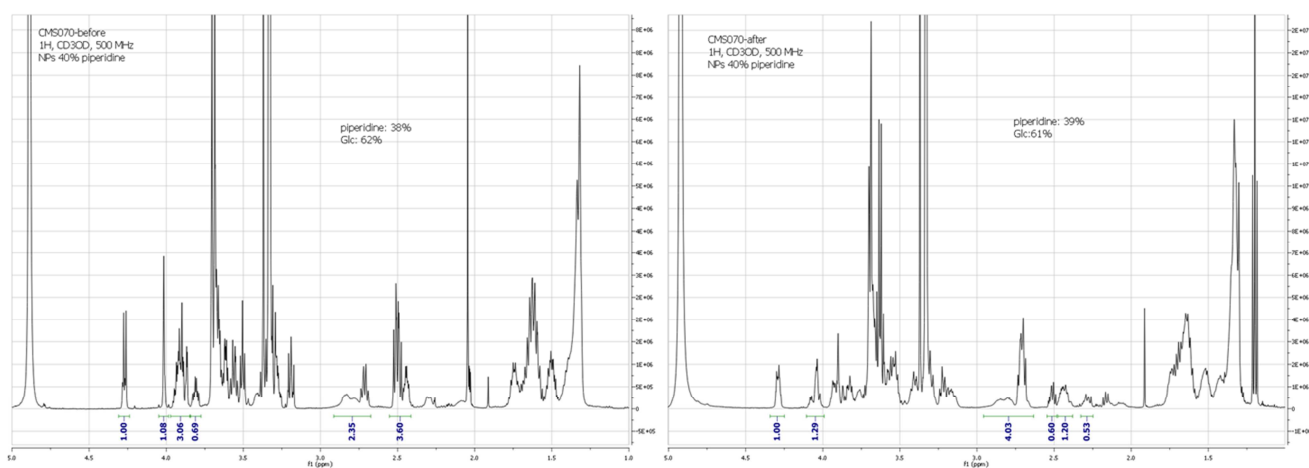

<sup>1</sup>H NMR of sugar/iminosugar ligands mixture before and after formation of Au-GNPs **17** (500 MHz, CD<sub>3</sub>OD).

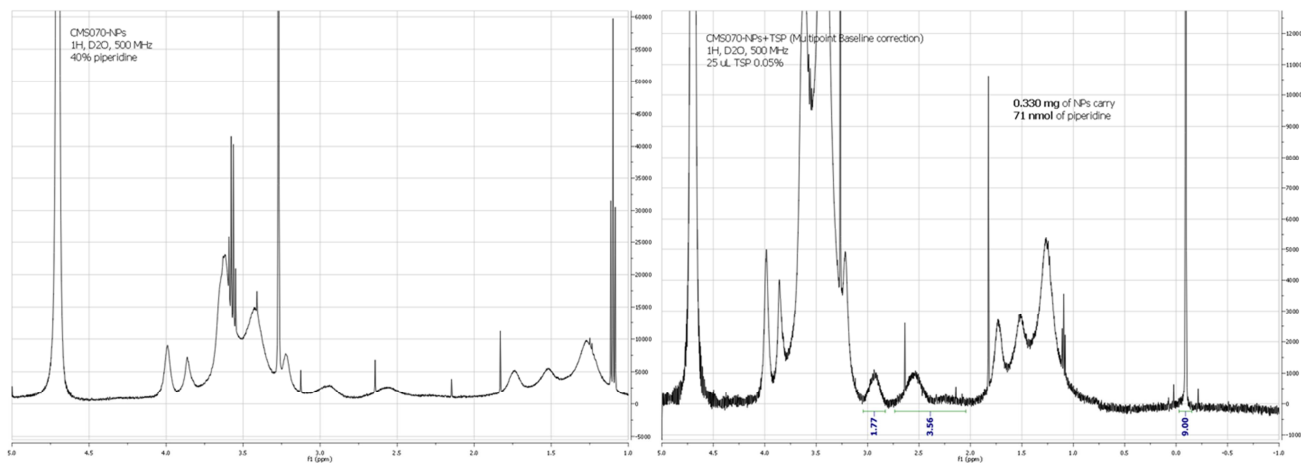

<sup>1</sup>H NMR and <sup>1</sup>H qNMR with TSP-*d*<sub>4</sub> of Au-GNPs **17** (500 MHz, D<sub>2</sub>O).

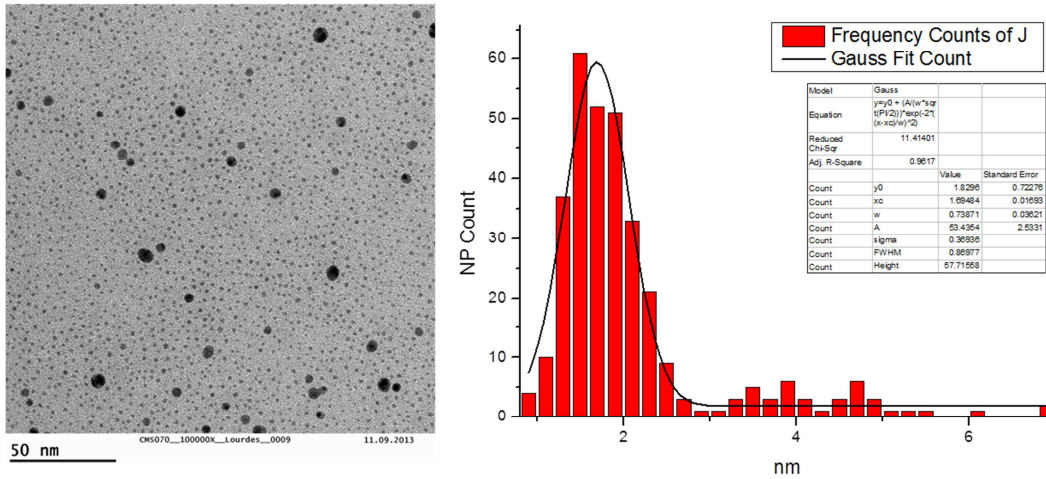

TEM micrograph in H<sub>2</sub>O and size-distribution histogram obtained by measuring 300 nanoparticles (average diameter 1.7 ± 0.4 nm).

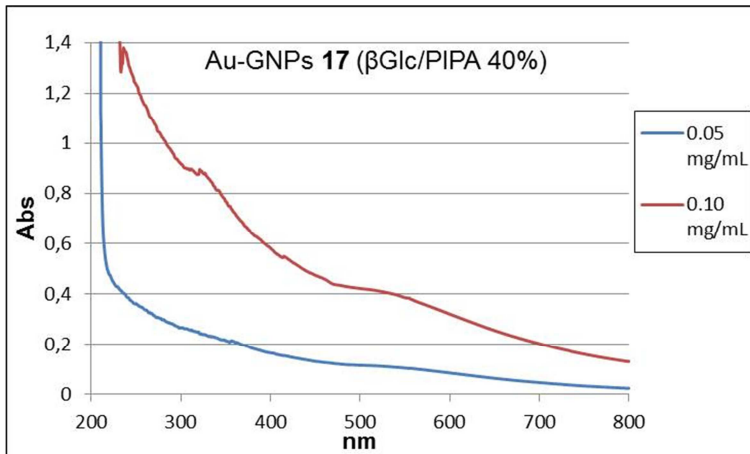

UV/vis spectra of H<sub>2</sub>O solution of Au-GNPs **17** recorded at two different concentrations.



**Inhibition data for monovalent reference compound *N*-acetyl **1** and Au-GNPs **12-15**, **18** and **19** towards a panel of commercial glycosidases.**

The percentage of inhibition towards the corresponding glycosidase was determined in the presence of 1 mM (for *N*-acetyl **1**) and 0.16 mg/mL (for Au-GNPs **12-15**, **18** and **19**) of the inhibitor on the well (except when other concentration is indicated). Each enzymatic assay (final volume 0.12 mL) contained 0.01 to 0.5 units mL<sup>-1</sup> of the enzyme and 10 mM aqueous solution of the appropriate *p*-nitrophenyl glycopyranoside substrate buffered to the optimal pH of the enzyme. The enzyme and the inhibitor were preincubated for 5 min at rt, and the reaction started by the addition of the substrate. After 20 min of incubation at 37 °C, the reaction was stopped by the addition of 0.1 mL of sodium borate buffer (pH 9.8). The *p*-nitrophenolate formed was measured by visible absorption spectroscopy at 405 nm. Under these conditions, the *p*-nitrophenolate released led to optical densities linear with both reaction time and concentration of the enzyme. For the best inhibitors (% inhibition ≥ 80), the IC<sub>50</sub> value (concentration of inhibitor required for 50% inhibition of enzyme activity) towards the corresponding glycosidase was calculated. IC<sub>50</sub> values were calculated from plots of percentage of inhibition *versus* inhibitor concentration. Each experiment (% inhibition, IC<sub>50</sub>) was performed in duplicate and the average values were given.

|                                                     | % Inhibition at 0.16 mg/mL of Au-GNP |                   |                   |                   |                    |           |           |
|-----------------------------------------------------|--------------------------------------|-------------------|-------------------|-------------------|--------------------|-----------|-----------|
|                                                     | IC <sub>50</sub> μM <sup>#</sup>     |                   |                   |                   |                    |           |           |
|                                                     | <b>N-acetyl 1</b> <sup>§</sup>       | <b>12</b>         | <b>13</b>         | <b>14</b>         | <b>15</b>          | <b>18</b> | <b>19</b> |
| <b>α-L-fucosidase</b><br>bovine kidney              | -                                    | -                 | -                 | -                 | -*                 | nd        | nd        |
| <b>α-galactosidase</b><br>coffee beans              | -                                    | -                 | -                 | -                 | -*                 | nd        | nd        |
| <b>β-galactosidase</b><br><i>Escherichia coli</i>   | -                                    | -                 | -                 | -                 | -*                 | nd        | nd        |
| <i>Aspergillus oryzae</i>                           | -                                    | -                 | -                 | -                 | nd                 | nd        | nd        |
| <b>α-glucosidase</b><br>yeast                       | -                                    | -                 | -                 | -                 | nd                 | nd        | nd        |
| rice                                                | -                                    | -                 | -*                | -                 | nd                 | nd        | nd        |
| <b>amyloglucosidase</b><br><i>Aspergillus niger</i> | 97%<br><b>1.7</b>                    | 83%<br><b>4.4</b> | 91%<br><b>8.3</b> | 83%<br><b>4.0</b> | 90%<br><b>13.9</b> | -         | -         |
| <b>β-glucosidase</b><br>almonds                     | 36%                                  | -                 | -*                | -                 | nd                 | nd        | nd        |
| <b>α-mannosidase</b><br>jack beans                  | -                                    | -                 | -                 | -                 | -*                 | nd        | nd        |
| <b>β-mannosidase</b><br>snail                       | -                                    | -                 | -                 | -                 | nd                 | nd        | nd        |
| <b>β-N-acetylglucosaminidase</b><br>jack beans      | 64%                                  | -                 | -*                | -                 | nd                 | nd        | nd        |

<sup>#</sup> : IC<sub>50</sub> is referred to the μM iminosugar concentration as determined by qNMR of GNPs.

<sup>§</sup> : Percentage of inhibition at 1 mM concentration of inhibitor.

- : no inhibition was detected at 0.16 mg/mL of inhibitor.

-\* : no inhibition was detected at 0.033 mg/mL of inhibitor.

nd: not determined

Monovalent compound: **N-acetyl 1**, whose synthesis has been previously reported.<sup>6</sup>

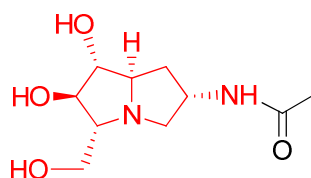

**N-acetyl 1**

<sup>6</sup> C. Parmeggiani, S. Catarzi, C. Matassini, G. D'Adamio, A. Morrone, A. Goti, P. Paoli, F. Cardona, *ChemBioChem*, 2015, **16**, 2054-2064.

**IC<sub>50</sub> graphic for compound for compound *N*-acetyl 1**

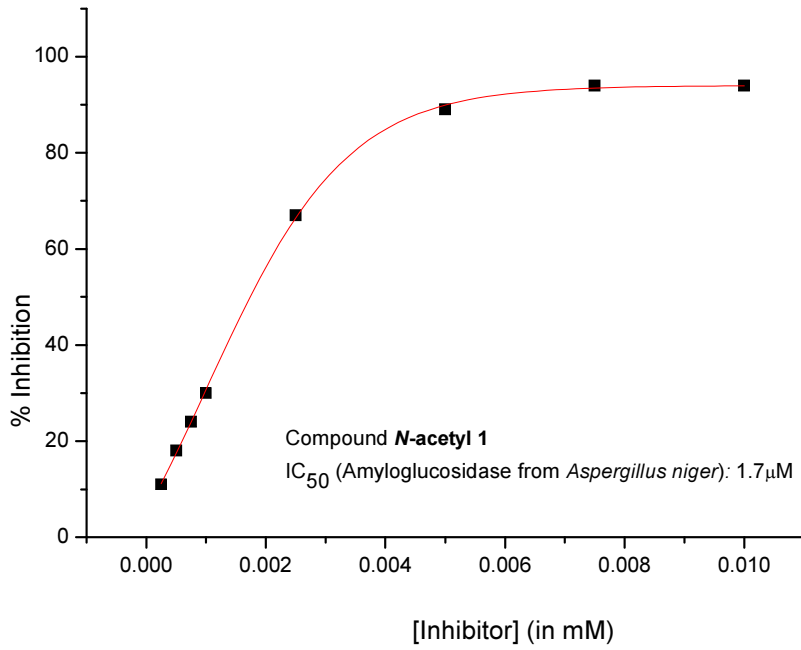

**IC<sub>50</sub> graphic for compound 12:**

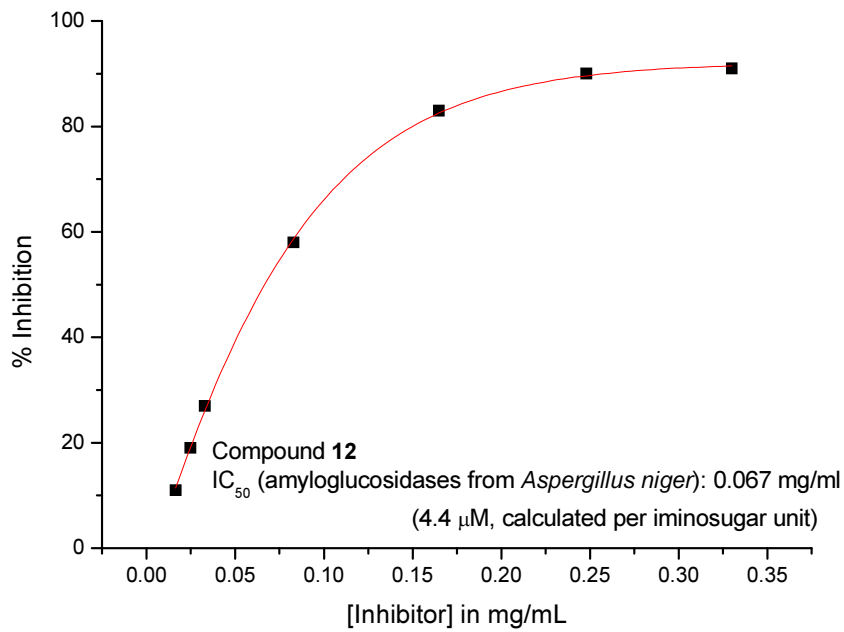

**IC<sub>50</sub> graphic for compound 13:**

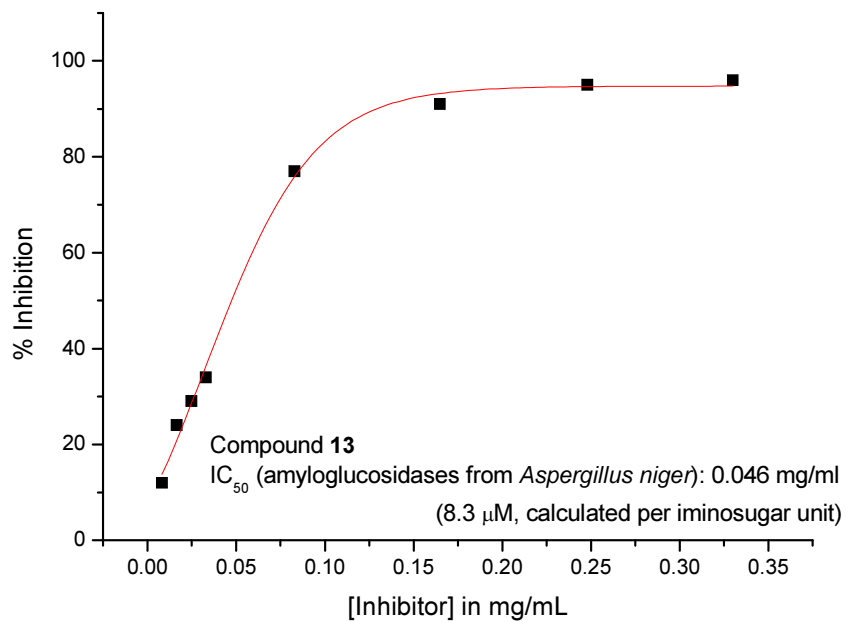

**IC<sub>50</sub> graphic for compound 14:**

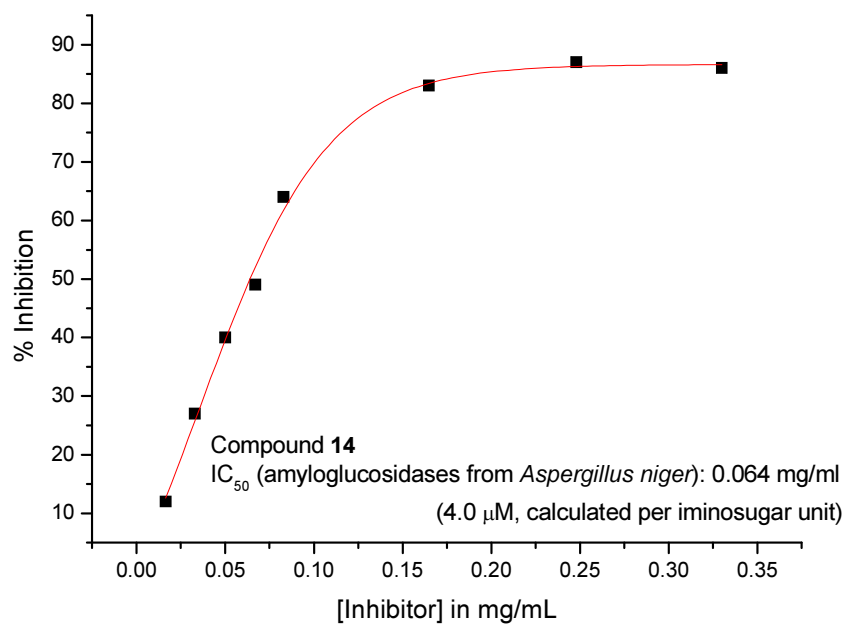

**IC<sub>50</sub> graphic for compound 15:**

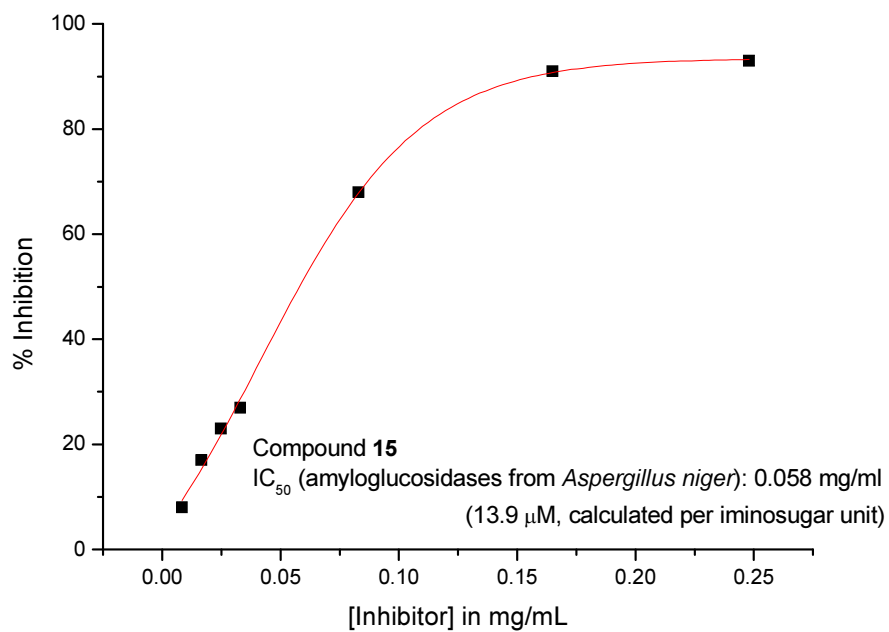

Supplement: c5ra22152h1.pdf [file c5ra22152h1.pdf]
